# Supplementary material
Source: publisher figshare collection journal article supplement (https://tandf.figshare.com/articles/dataset/_/24903479)
Supplement: Supplementary file 1 [file 1]

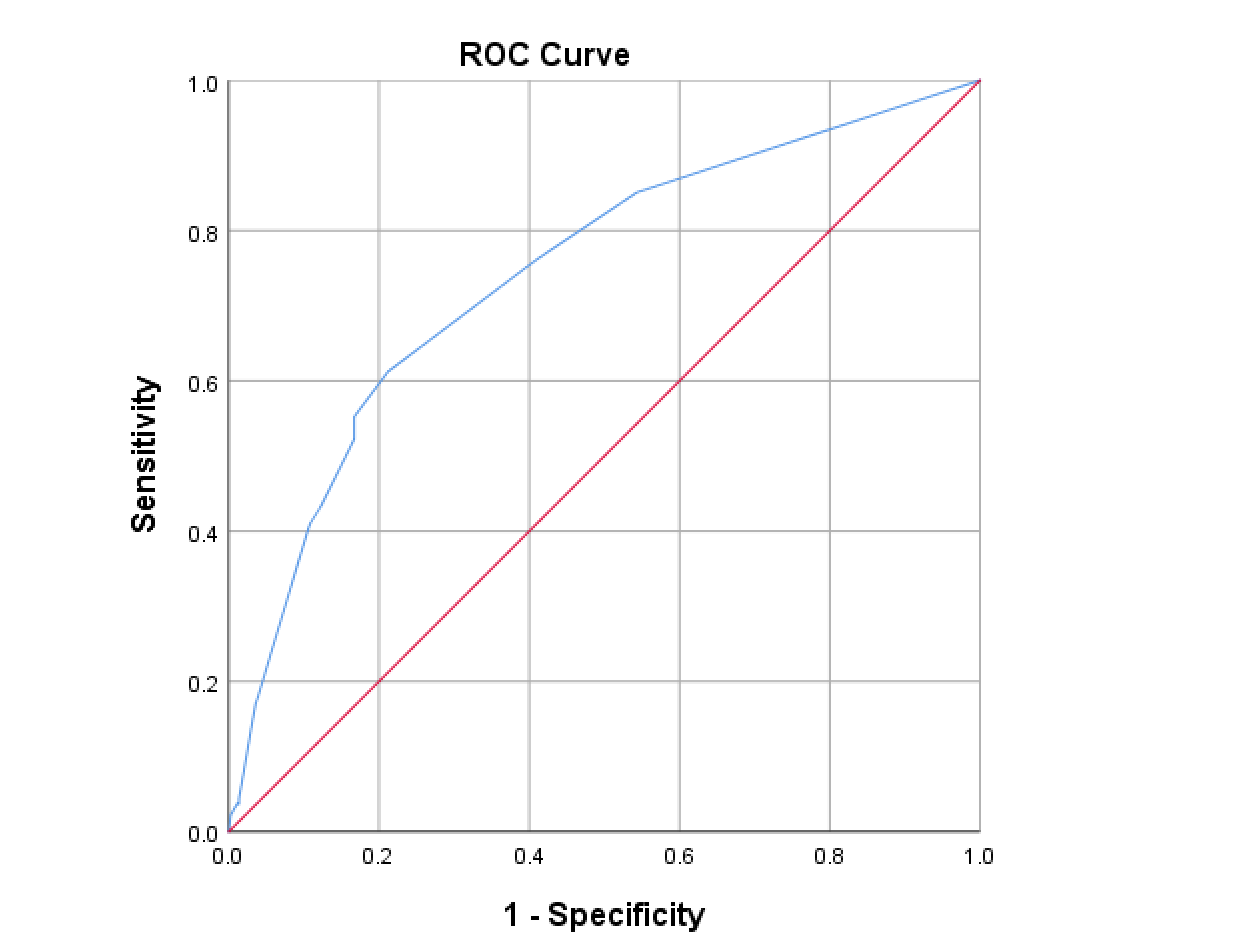


Figure S1. The discriminatory capacity of related factors for distinguishing between medical students with and without suicidal ideation who have experienced workplace violence. The AUC value for the combination of relationship status, depression symptoms, history of mental disorders, and learning burnout was o.743.
